# Supplementary material for: The evolution of Runx genes I. A comparative study of sequences from phylogenetically diverse model organisms
Source: Springer Nature journal article supplement (doi:10.1186/1471-2148-3-4), 2003-03-24
Supplement: Additional file 3 [file 1471-2148-3-4-s3.doc]

## DEUTEROSTOME REPRESENTATIVES

## Mouse

gt-ag

(*7475)*

g..gt-ag..gc

*(30117)*

g..gt-ag..cg

*(6436)*

g..gt-ag..at

(20101)

a..gt-ag..ga

(24950)

52

35

64

54

90

156

***MmRunx1***

(90kb)

a..gt-ag..at

*(35556)*

g..gt-ag..at

*(18722)*

a..gt-ag.gg

*(*58909*)*

g..gt-ag..gc

*(7343)*

gt-ag

*(1027)*

g..gt-ag..gt

(1645)

134

22

159

52

35

58

52

***MmRunx2***

(134kb)

g..gt-ag..gg

*(7876)*

g..gt-ag..gc

*(4205)*

c..gt-ag..gg

*(11044)*

gt-ag

*(2226)*

***MmRunx3***

95

52

35

50

177

(26kb)

## Pufferfish

# *TrRunx1*

(11kb)

g..gt-ag..cc *(229)*

g..gt-ag..at *(3071)*

c..gt-ag..gt

*(1286)*

g..gt-ag..gg *(2912)*

gt-ag *(73)*

g..gt-ag..ac

*(1181)*

gt-ag *(1147)*

9

51

37

52

35

72

41

140

at..gt-ag..c

*(87)*

g..gt-ag.gt

*(2522)*

g..gt-ag.ac

*(1788)*

a..gt-ag..gg

*(8552)*

g..gt-ag..gc

*(1344)*

gt-ag

*(1062)*

93

52

35

56

54

39

81

***TrRunx2***

(16kb)

gg..gt-ag..g

*(8877)*

a..gt-ag..at

*(9909)*

g..gt-ag..gc

*(1160)*

gt-ag

*(546)*

86

52

35

77

152

# *TrRunx3*

(22kb)

## Tunicate

c..gt-ag..gt

*(1129)*

g..gt-ag.gc

*(864)*

g..gt-ag..gg *(244)*

g..gt-ag..tt

(94)

g..gt-ag..gt *(533)*

g..gt-ag.gc

*(2157)*

g..gt-ag..tg

*(58)*

# *CiRunt*

361

52

35

33

64

37

30

196

(7.6kb)

## Sea Urchin

g..gt-ag..gc

*(~4500)*

g..gt-ag..gc

*(~9500)*

149

35

351

# *SpRunt*

(~15kb)

**PROTOSTOME REPRESENTATIVES**

## Fruit Fly

a..gt-ag.gc

*(410)*

***DmRunt***

236

274

(2kb)

gt-ag

*(6331)*

a..gt-ag..gt

*(1257)*

g..gt-ag..gg

*(5333)*

g..gt-ag..tg

*(1538)*

***DmLz***

287

80

38

121

300

(17kb)

a..gt-ag..tg

*(5380)*

g..gt-ag..gg

*(5335)*

gt-ag

*(385)*

gt-ag

*(115)*

***DmA***

33

18

245

38

329

(13kb)

gt-ag

(11035)

g..gt-ag..gc

*(11527)*

gt-ag

*(557)*

130

72

37

363

***DmB***

(25kb)

## Mosquito

a..gt-ag.gc

*(19627)*

***AgRunt***

156

355

(21.2kb)

gt-ag

*(3299)*

a..gt-ag..gt

*(4611)*

g..gt-ag..gg

*(4384)*

g..gt-ag..tg

*(1912)*

***AgLz***

103

80

38

69

244

(15.4kb)

gt-ag

(???)

g..gt-ag..gc

*(64585)*

230

38

???

***AgA***

( ? kb)

## Nematode

g..gt-ag..gc

(801)

gt-ag

*(607)*

g..gt-ag..ta

(52)

cc..gt-ag..c

*(59)*

gt-ag

*(976)*

g..gt-ag..ta

(256)

gt-ag

*(897)*

**CeRun**

23

39

40

25

39

19

40

76

(4.5kb)
